# Supplementary material for: Self-Healable and Recyclable Dual-Shape Memory Liquid Metal–Elastomer Composites
Source: MDPI journal article supplement (doi:10.3390/polym14112259), 2022-06-01
Supplement: s1 [file s1]

# Self-Healable and Recyclable Dual-Shape Memory Liquid Metal–Elastomer Composites

Xiaobo Deng <sup>1,†</sup>, Guokang Chen <sup>1,†</sup>, Yifan Liao <sup>2</sup>, Xi Lu <sup>1</sup>, Shuangyan Hu <sup>1</sup>, Tiansheng Gan <sup>1</sup>,  
Stephan Handschuh-Wang <sup>1</sup> and Xueli Zhang <sup>1,\*</sup>

- <sup>1</sup> College of Chemistry and Environmental Engineering, Shenzhen University, Shenzhen 518060, China; 1900221020@email.szu.edu.cn (X.D.); cgk@szu.edu.cn (G.C.); xlu@szu.edu.cn (X.L.); shuangyan\_hu@szu.edu.cn (S.H.); gantiansheng@szu.edu.cn (T.G.); stephan@szu.edu.cn (S.H.-W.)  
<sup>2</sup> Shenzhen Middle School, Shenzhen 518001, China; millerliao2019@outlook.com  
\* Correspondence: xlzhang@szu.edu.cn.  
† These authors contributed equally.

**Video S1:** Shape recovery of the programmed Ga-PU composite.

**Video S2:** A soft gripper grasping and transferring an object.

**Video S3:** A light-controlled switch made of Ga-PU composite for a LED circuit.

**Video S4:** A self-healing LED circuit with Ga-PU composite as conductor.

**Video S5:** The recycling of the LM and PU elastomer.

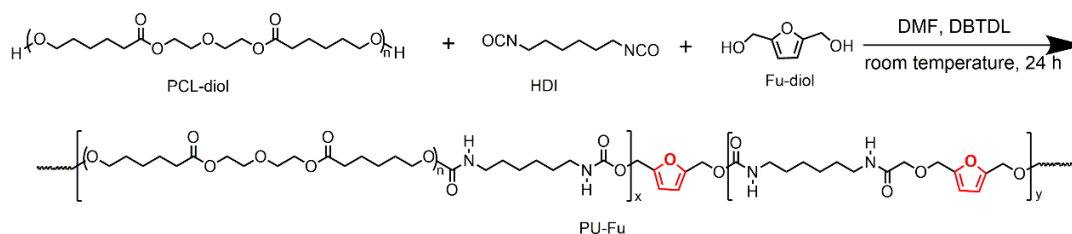

**Scheme S1.** Schematic of the chemical synthesis of the PU prepolymer.

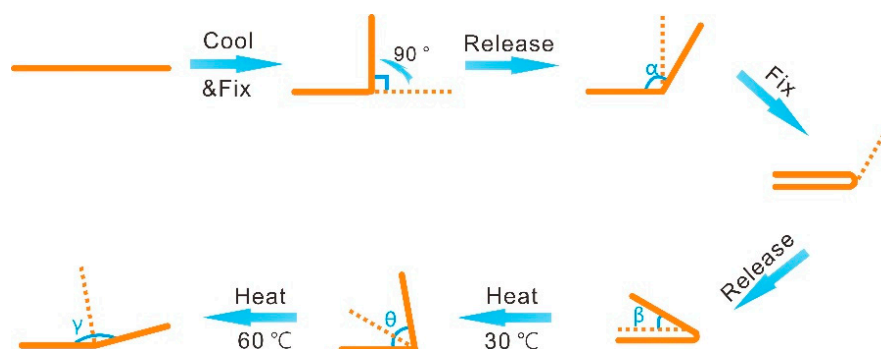

**Figure S1.** Schematic illustration of the definition of the released angle and the recovered angle.

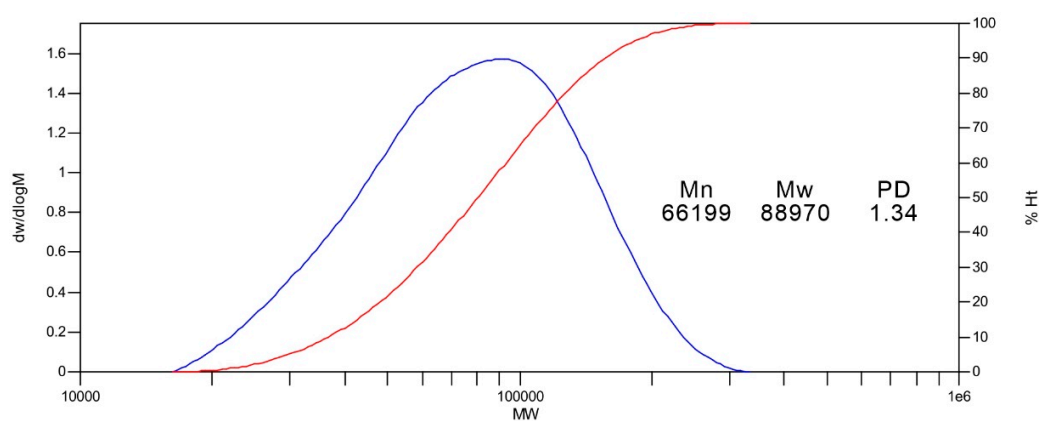

**Figure S2.** Molecular weight distribution of the PU prepolymer measured by a gel permeation chromatography (GPC) system with polystyrene as a standard and DMF as eluent (solvent) at a flow rate of 1.0 mL min<sup>-1</sup>.

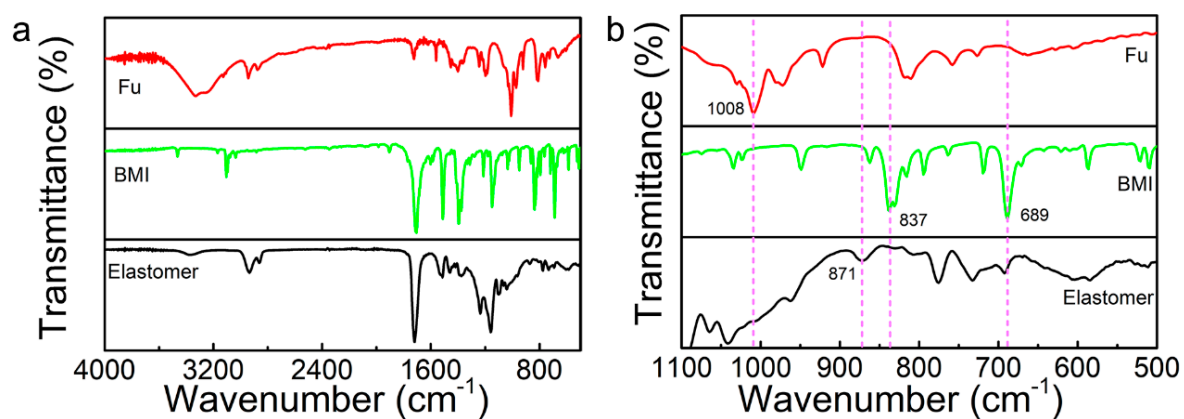

**Figure S3.** (a-b) The FT-IR spectra of 2,5-furandimethanol (Fu), 4,4'-bismaleimidodiphenylmethane (BMI), and PU elastomer in the range from (a) 400 to 4000  $\text{cm}^{-1}$  and (b) 500 to 1100  $\text{cm}^{-1}$ .

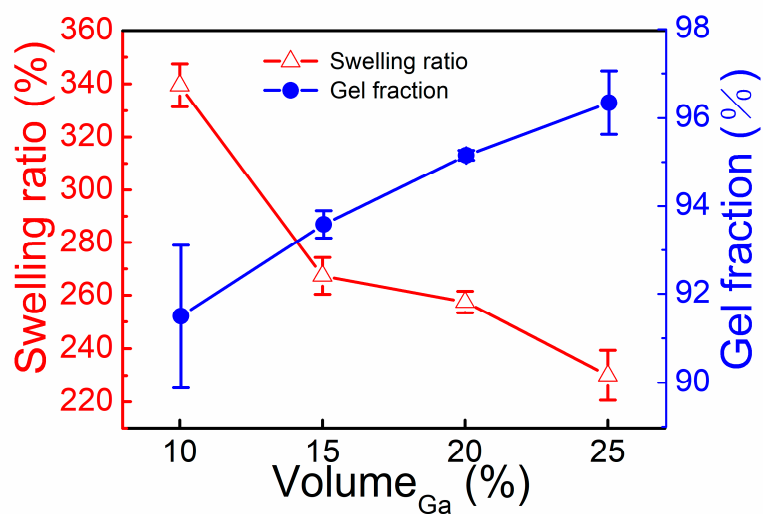

**Figure S4.** Gel fraction and swelling fraction of the Ga-PU composites.

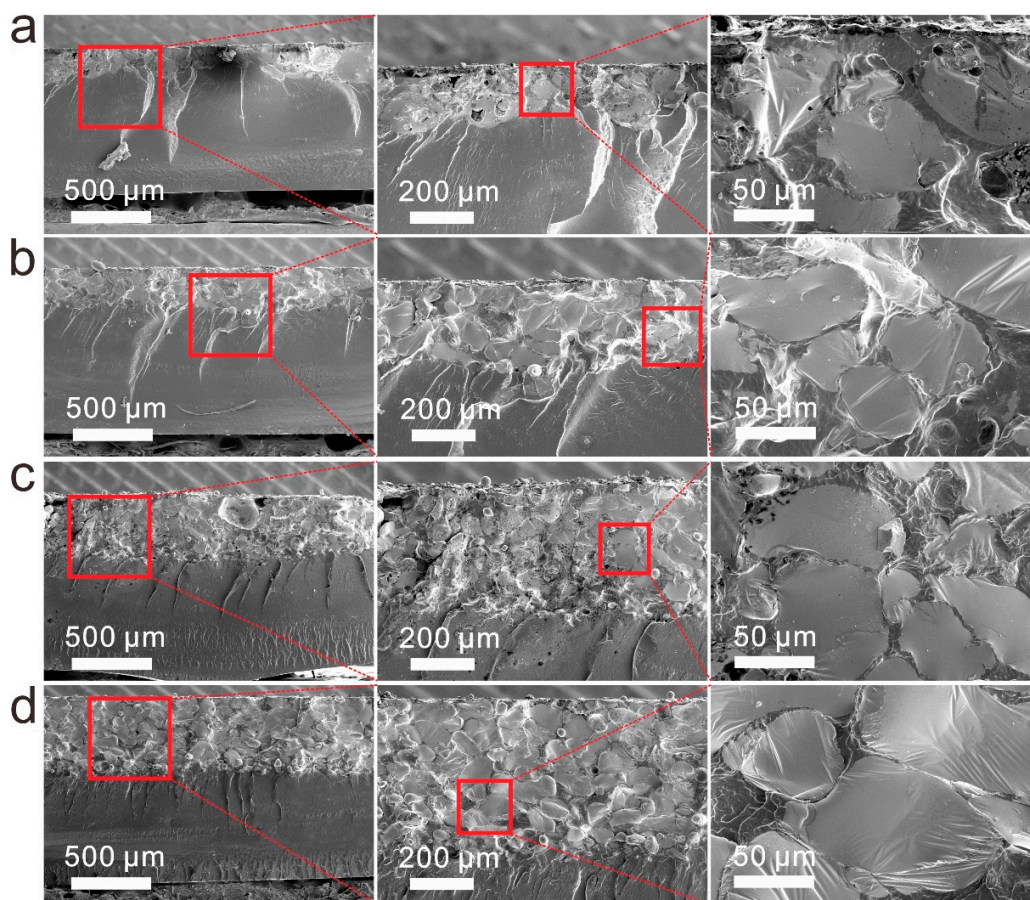

**Figure S5.** SEM micrographs of Ga-PU composite. The Ga-PU composites fabricated with a Ga volume ratio of (a) 10%, (b) 15%, (c) 20%, (d) 25%. The first column shows the whole composite, the second column shows the Ga-rich layer, and the third column shows a magnification of Ga droplets.

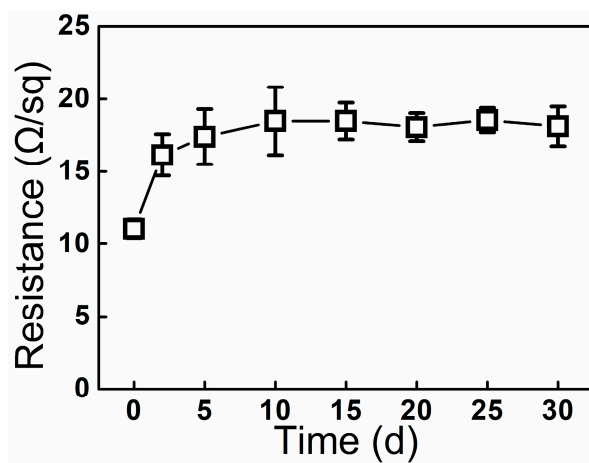

**Figure S6.** Sheet resistance of the Ga-PU composite with 25 vol% of Ga as a function of monitoring time under ambient condition.

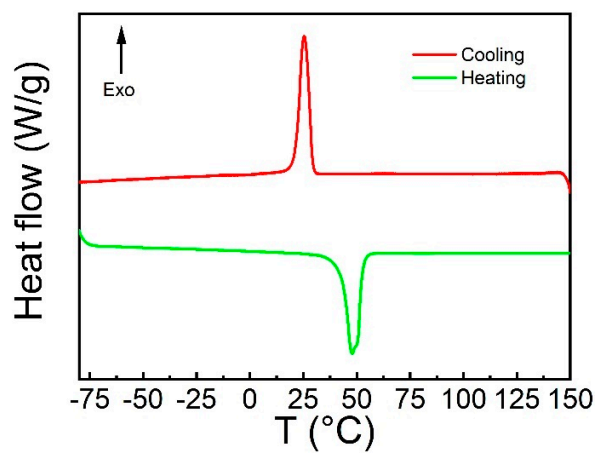

**Figure S7.** Differential scanning calorimetry (DSC) curve of the PCL-diol.

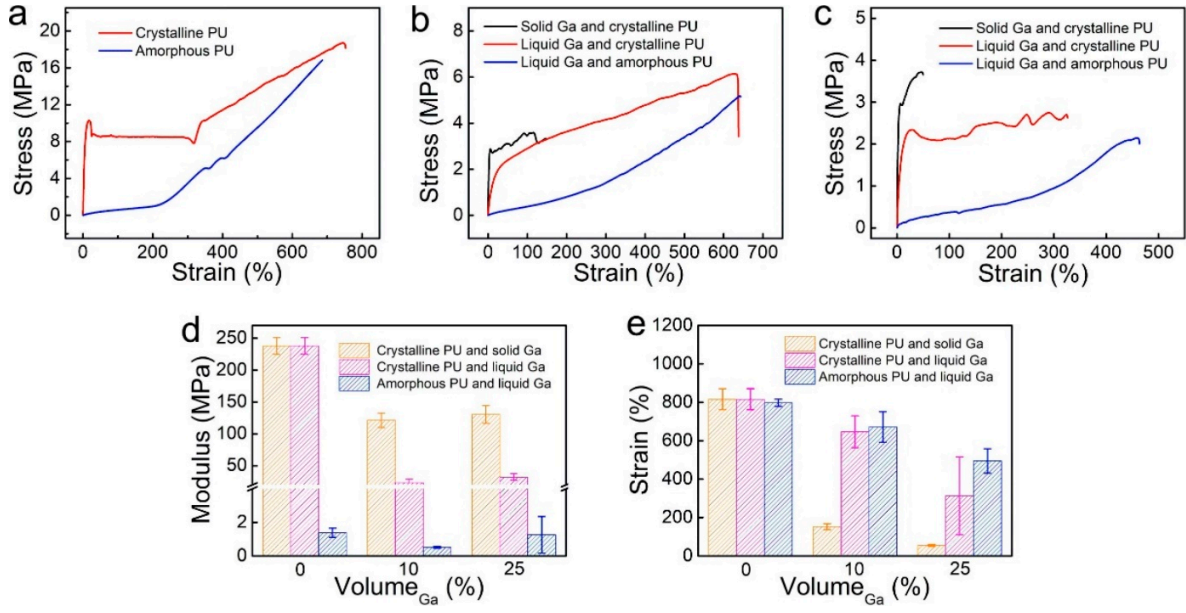

**Figure S8.** (a) Representative stress-strain curves of (a) a PU elastomer, (b) a Ga-PU composite with 10 vol% Ga, and (c) a Ga-PU composite with 25 vol% Ga. (d) Elastic modulus and (e) strain at break for a PU elastomer and a Ga-PU composites with 10 and 25 vol% Ga.

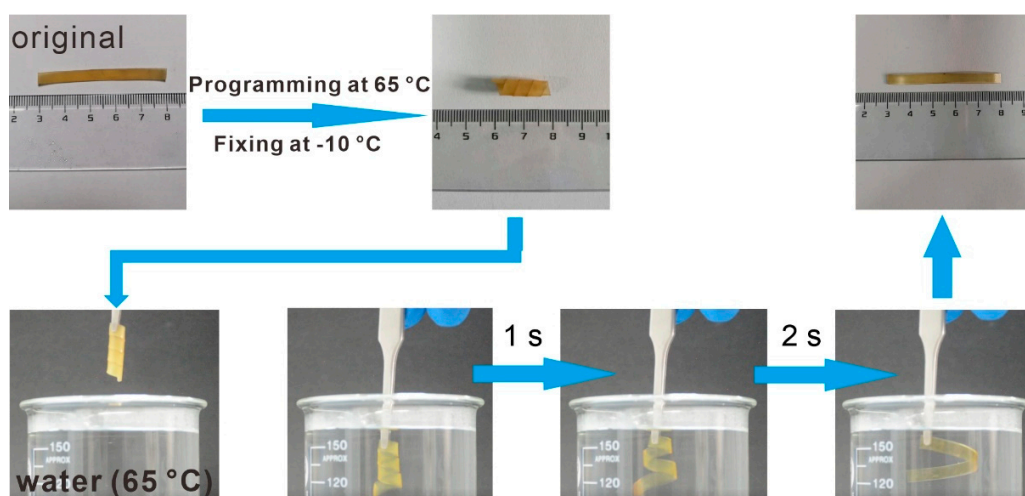

**Figure S9.** Shape programming and shape recovery of the pure PU elastomer. A strip of elastomer was programmed into curled shape at 65 °C, and then fixed at -10 °C. The shape recovery of the curled-shaped elastomer was conducted by immersing in 65 °C water.

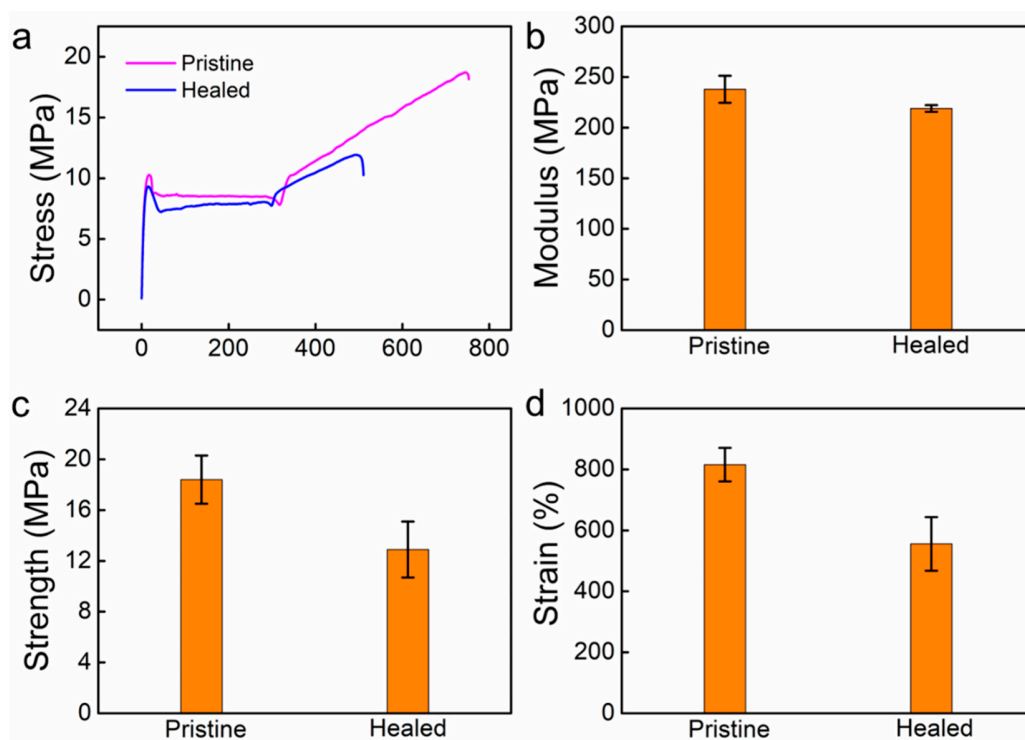

**Figure S10.** Mechanical properties of the pristine and healed PU elastomers. (a) The stress-strain curves, (b) the elastic modulus, (c) the strength at break, and (d) the strain at break for the pristine elastomer and the damaged elastomer healed at 120 °C for 10 minutes and 65 °C for 72 hours.
